# Supplementary material for: Engineering Escherichia coli FAB system using synthetic plant genes for the production of long chain fatty acids
Source: PubMed Central journal article supplement (PMC6777021; doi:10.1186/s12934-019-1217-7), 2019-10-03
Supplement: 12934_2019_1217_MOESM1_ESM.pdf [file 12934_2019_1217_MOESM1_ESM.pdf]

**Additional file**

Engineering *Escherichia coli* FAB system using synthetic plant genes for the production of long chain fatty acids. Elias Kassab<sup>1</sup>, Monika Fuchs<sup>1</sup>, Martina Haack<sup>1</sup>, Norbert Mehlmer<sup>1</sup>, Thomas B. Brueck<sup>1\*</sup>.

**Table S1:** Fatty acid distribution in  $\mu\text{g/g}$  DCW of wild type *Escherichia coli* BL21 (DE3) at different time intervals. T=0: directly before induction with IPTG, t=12: 12 hours after induction with IPTG, t=24: 24 hours after induction with IPTG. All fatty acid values are the average of at least three biological replicates with the associated standard deviation indicated.

| BL21 (DE3) pET28a-                          |     |            |      |            |      |            |
|---------------------------------------------|-----|------------|------|------------|------|------------|
| Fatty acid distribution ( $\mu\text{g/g}$ ) | T=0 |            | T=12 |            | T=24 |            |
| C12:0                                       | 2   | $\pm 0.12$ | 8    | $\pm 0.41$ | 12   | $\pm 0.49$ |
| C14:0                                       | 4   | $\pm 0.40$ | 12   | $\pm 0.65$ | 20   | $\pm 1.12$ |
| C16:0                                       | 75  | $\pm 2.05$ | 155  | $\pm 5.45$ | 260  | $\pm 5.02$ |
| C16:1                                       | 27  | $\pm 1.25$ | 20   | $\pm 1.41$ | 30   | $\pm 1.10$ |
| C18:0                                       | 3   | $\pm 0.12$ | 3    | $\pm 0.11$ | 6    | $\pm 0.41$ |
| C18:1 (vaccenate)                           | 57  | $\pm 1.25$ | 83   | $\pm 1.48$ | 135  | $\pm 2.96$ |
| C17:0c                                      | 1   | $\pm 0.00$ | 1    | $\pm 0.00$ | 1    | $\pm 0.00$ |
| C19:0c                                      | 3   | $\pm 0.22$ | 36   | $\pm 1.87$ | 69   | $\pm 2.50$ |
| total                                       | 172 | $\pm 5$    | 318  | $\pm 11$   | 533  | $\pm 14$   |

**Table S2:** Fatty acid distribution in  $\mu\text{g/g}$  DCW of *Escherichia coli* BL21 (DE3) expressing pET28aKASI at different time intervals. T=0: directly before induction with IPTG, t=12: 12 hours after induction with IPTG, t=24: 24 hours after induction with IPTG. All fatty acid values are the average of at least three biological replicates with the associated standard deviation indicated.

| BL21 (DE3) pET28a KASI                      |     |            |      |             |      |            |
|---------------------------------------------|-----|------------|------|-------------|------|------------|
| Fatty acid distribution ( $\mu\text{g/g}$ ) | T=0 |            | T=12 |             | T=24 |            |
| C12:0                                       | 4   | $\pm 0.12$ | 25   | $\pm 1.16$  | 20   | $\pm 0.67$ |
| C14:0                                       | 5   | $\pm 0.05$ | 24   | $\pm 1.06$  | 18   | $\pm 0.59$ |
| C16:0                                       | 65  | $\pm 4.40$ | 291  | $\pm 12.76$ | 483  | $\pm 16.8$ |
| C16:1                                       | 27  | $\pm 1.27$ | 80   | $\pm 3.37$  | 132  | $\pm 5.80$ |
| C18:0                                       | 3   | $\pm 0.07$ | 17   | $\pm 0.52$  | 27   | $\pm 1.42$ |
| C18:1 (vaccenate)                           | 47  | $\pm 1.95$ | 228  | $\pm 7.29$  | 349  | $\pm 8.62$ |
| C17:0c                                      | 1   | $\pm 0.00$ | 2    | $\pm 0.10$  | 5    | $\pm 0.88$ |
| C19:0c                                      | 3   | $\pm 0.09$ | 21   | $\pm 0.30$  | 34   | $\pm 1.20$ |
| Total                                       | 155 | $\pm 8$    | 688  | $\pm 27$    | 1068 | $\pm 36$   |

**Table S3:** Fatty acid distribution in  $\mu\text{g/g}$  DCW of *Escherichia coli* BL21 (DE3)  $\Delta\text{fadD}$  pET28a- versus BL21 (DE3)  $\Delta\text{fadD}$  expressing pET28aKASI and pET28aKASII separately. Samples were collected 48 hours after induction with IPTG. All fatty acid values are the average of at least three biological replicates with the associated standard deviation indicated.

| BL21 (DE3)                                  |                       |           |                           |            |                            |            |
|---------------------------------------------|-----------------------|-----------|---------------------------|------------|----------------------------|------------|
| Fatty acid distribution ( $\mu\text{g/g}$ ) | $\Delta\text{fadD}$ - |           | $\Delta\text{fadD}$ -KASI |            | $\Delta\text{fadD}$ -KASII |            |
| C12:0                                       | 20                    | $\pm 0.7$ | 38                        | $\pm 1.6$  | 20                         | $\pm 0.6$  |
| C14:0                                       | 44                    | $\pm 1.2$ | 66                        | $\pm 2.3$  | 42                         | $\pm 1.3$  |
| C16:0                                       | 198                   | $\pm 9.9$ | 371                       | $\pm 16.9$ | 221                        | $\pm 14.3$ |
| C16:1                                       | 5                     | $\pm 0.4$ | 168                       | $\pm 5.8$  | 90                         | $\pm 3.8$  |
| C18:0                                       | 3                     | $\pm 0.2$ | 5                         | $\pm 0.3$  | 4                          | $\pm 0.2$  |
| C18:1 (vaccenate)                           | 20                    | $\pm 1.1$ | 188                       | $\pm 4.7$  | 88                         | $\pm 3.6$  |
| C17:0c                                      | 122                   | $\pm 4.0$ | 63                        | $\pm 2.7$  | 20                         | $\pm 0.8$  |
| C19:0c                                      | 60                    | $\pm 2.4$ | 13                        | $\pm 0.4$  | 67                         | $\pm 1.2$  |
| total                                       | 471                   | $\pm 20$  | 912                       | $\pm 34$   | 557                        | $\pm 26$   |

**Table S4:** Fatty acid distribution in  $\mu\text{g/g}$  DCW of *Escherichia coli* BL21 (DE3)  $\Delta\text{fabF}$  pET28a- versus BL21 (DE3)  $\Delta\text{fadD}$  expressing pET28aKASII. Samples were collected 48 hours after induction with IPTG. All fatty acid values are the average of at least three biological replicates with the associated standard deviation indicated.

| BL21DE3                                     |                     |           |                             |            |
|---------------------------------------------|---------------------|-----------|-----------------------------|------------|
| Fatty acid distribution ( $\mu\text{g/g}$ ) | $\Delta\text{fabF}$ |           | $\Delta\text{fabF}$ - KASII |            |
| C12:0                                       | 13                  | $\pm 0.3$ | 12                          | $\pm 0.3$  |
| C14:0                                       | 34                  | $\pm 0.4$ | 28                          | $\pm 0.8$  |
| C16:0                                       | 164                 | $\pm 1.2$ | 148                         | $\pm 4.3$  |
| C16:1                                       | 40                  | $\pm 0.4$ | 114                         | $\pm 3.1$  |
| C18:0                                       | 3                   | $\pm 0.1$ | 7                           | $\pm 0.2$  |
| C18:1 (vaccenate)                           | 7                   | $\pm 0.0$ | 27                          | $\pm 0.8$  |
| C17:0c                                      | 137                 | $\pm 0.7$ | 35                          | $\pm 1.2$  |
| C19:0c                                      | 0                   | $\pm 0.0$ | 0                           | $\pm 0.0$  |
| Total                                       | 397                 | $\pm 2.8$ | 370                         | $\pm 10.7$ |

**Table S5:** Fatty acid distribution in  $\mu\text{g}/\text{mg}$  DCW of the 1.3 Liter fermentation of *Escherichia coli* BL21 (DE3)  $\Delta\text{fadD}$  expressing an empty pET28a vector, pET28aKASI and pET28aKASII respectively. Samples were collected 48 hours after induction with IPTG. All fatty acid values are the average of at least three biological replicates with the associated standard deviation indicated.

| BL21DE3                                             |                     |           |                           |           |                            |           |
|-----------------------------------------------------|---------------------|-----------|---------------------------|-----------|----------------------------|-----------|
| Fatty acid distribution ( $\mu\text{g}/\text{mg}$ ) | $\Delta\text{fadD}$ |           | $\Delta\text{fadD}$ -KASI |           | $\Delta\text{fadD}$ -KASII |           |
| C12:0                                               | 7                   | $\pm 0.2$ | 12                        | $\pm 0.2$ | 9                          | $\pm 0.1$ |
| C14:0                                               | 16                  | $\pm 0.7$ | 26                        | $\pm 0.8$ | 20                         | $\pm 0.2$ |
| C16:0                                               | 78                  | $\pm 2.7$ | 137                       | $\pm 2.9$ | 104                        | $\pm 1.1$ |
| C16:1                                               | 6                   | $\pm 0.3$ | 23                        | $\pm 0.4$ | 8                          | $\pm 0.1$ |
| C18:0                                               | 6                   | $\pm 0.1$ | 18                        | $\pm 0.1$ | 9                          | $\pm 0.1$ |
| C18:1 (vaccenate)                                   | 16                  | $\pm 0.5$ | 41                        | $\pm 0.8$ | 29                         | $\pm 0.3$ |
| C17:0c                                              | 7                   | $\pm 0.1$ | 9                         | $\pm 0.2$ | 11                         | $\pm 0.1$ |
| C19:0c                                              | 20                  | $\pm 0.4$ | 26                        | $\pm 0.3$ | 31                         | $\pm 0.4$ |
| total                                               | 157                 | $\pm 5$   | 292                       | $\pm 6$   | 222                        | $\pm 2$   |

**Table S6:** Fatty acid distribution in  $\mu\text{g}/\text{mg}$  DCW of the 1.3 Liter fermentation of *Escherichia coli* BL21 (DE3)  $\Delta\text{fabF}$  expressing pET28aKASI and pET28aKASII respectively. Samples were collected 48 hours after induction with IPTG. All fatty acid values are the average of at least three biological replicates with the associated standard deviation indicated.

| BL21DE3                                             |                           |            |                            |            |  |
|-----------------------------------------------------|---------------------------|------------|----------------------------|------------|--|
| Fatty acid distribution ( $\mu\text{g}/\text{mg}$ ) | $\Delta\text{fabF}$ -KASI |            | $\Delta\text{fabF}$ -KASII |            |  |
| C12:0                                               | 10                        | $\pm 0.28$ | 4                          | $\pm 0.14$ |  |
| C14:0                                               | 20                        | $\pm 0.51$ | 15                         | $\pm 0.29$ |  |
| C16:0                                               | 97                        | $\pm 0.81$ | 105                        | $\pm 0.47$ |  |
| C16:1                                               | 17                        | $\pm 0.12$ | 12                         | $\pm 0.09$ |  |
| C18:0                                               | 12                        | $\pm 0.04$ | 5                          | $\pm 0.05$ |  |
| C18:1 (vaccenate)                                   | 3                         | $\pm 0.06$ | 9                          | $\pm 0.18$ |  |
| C17:0c                                              | 7                         | $\pm 0.42$ | 5                          | $\pm 0.41$ |  |
| C19:0c                                              | 2                         | $\pm 0.04$ | 6                          | $\pm 0.09$ |  |
| total                                               | 167                       | $\pm 2.28$ | 162                        | $\pm 1.71$ |  |

**Table S7:** Growth analysis of M9 minimal media shake flask studies of wild type *Escherichia coli* BL21 (DE3) expressing pET28a-, pET28aKASI and pET28aKASII respectively. Absorbance values (OD600) are the average of at least three biological replicates.

| M9 media | BL21 (DE3) pET28a- |                    |                      | BL21 (DE3) pET28a-KASI |                    |                      | BL21 (DE3) pET28a-KASII |                    |                      |
|----------|--------------------|--------------------|----------------------|------------------------|--------------------|----------------------|-------------------------|--------------------|----------------------|
|          | Absorbance         | Exponential growth | Specific growth rate | Absorbance             | Exponential growth | Specific growth rate | Absorbance              | Exponential growth | Specific Growth rate |
| 0        | 0.186              | -0.73048706        | 0.32850407           | 0.162                  | -0.79048499        | 0.42985656           | 0.178                   | -0.74958           | 0.29328433           |
| 1        | 0.25833333         | -0.58781955        | 0.58921933           | 0.249                  | -0.60380065        | 0.62887636           | 0.23866667              | -0.62220823        | 0.61774916           |
| 2        | 0.46566667         | -0.33192485        | 0.685242             | 0.467                  | -0.33068312        | 0.68454498           | 0.44266667              | -0.35392318        | 0.67337467           |
| 3        | 0.924              | -0.03432803        | 0.44229647           | 0.926                  | -0.03338901        | 0.44568217           | 0.868                   | -0.06148027        | 0.48515327           |
| 4        | 1.438              | 0.15775889         | 0.21896236           | 1.446                  | 0.16016829         | 0.23003538           | 1.41                    | 0.14921911         | 0.23862592           |
| 5        | 1.79               | 0.25285303         | 0.25719407           | 1.82                   | 0.26007139         | 0.23189634           | 1.79                    | 0.25285303         | 0.20624174           |
| 6        | 2.315              | 0.364551           | 0.10643985           | 2.295                  | 0.36078269         | 0.10536052           | 2.2                     | 0.34242268         | 0.12783337           |
| 7        | 2.575              | 0.41077723         | -0.00094884          | 2.55                   | 0.40654018         | -0.0021777           | 2.5                     | 0.39794001         | -0.00172118          |
| 23.5     | 2.535              | 0.40397796         | -0.03410561          | 2.46                   | 0.39093511         | -0.04447024          | 2.43                    | 0.38560627         | -0.05715841          |
| 24.5     | 2.45               | 0.38916608         | -0.00136193          | 2.353                  | 0.37162193         | -0.00085052          | 2.295                   | 0.36078269         | -0.0043716           |

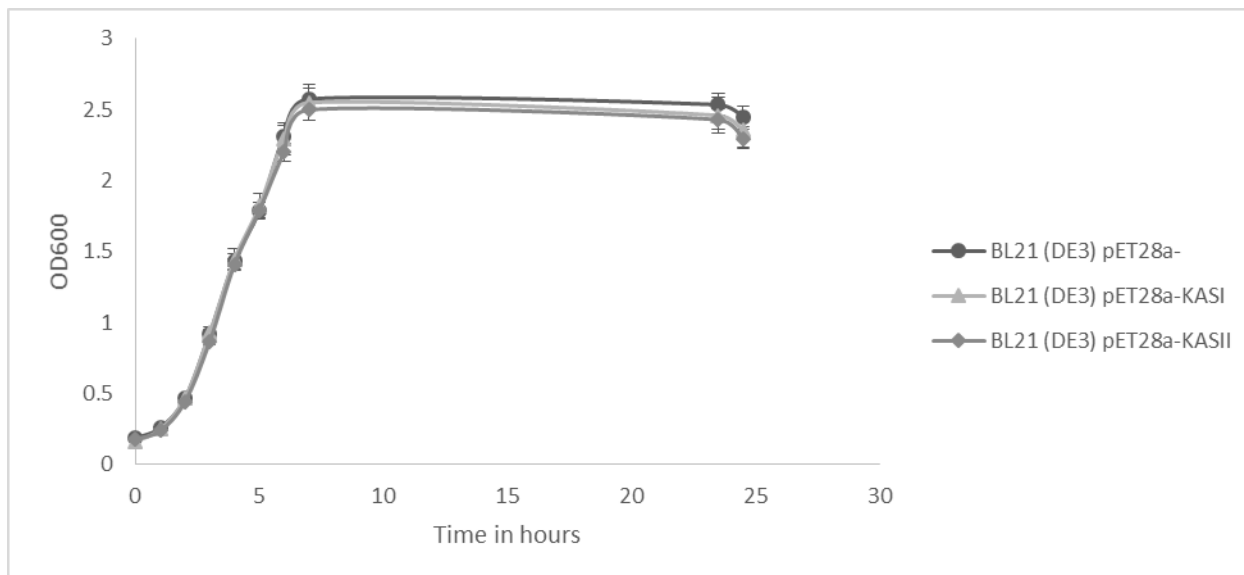

**Figure S1:** Growth curve of M9 minimal media shake flask studies of wild type *Escherichia coli* BL21 (DE3) expressing pET28a-, pET28aKASI and pET28aKASII respectively. Absorbance values (OD600) are the average of at least three biological replicates with the associated standard deviation indicated.
